# Supplementary material for: Application of Pseudomonas fluorescens to Blackberry under Field Conditions Improves Fruit Quality by Modifying Flavonoid Metabolism
Source: PubMed Central journal article supplement (PMC4641737; doi:10.1371/journal.pone.0142639), 2015-11-11

1 Supplemental material 2.

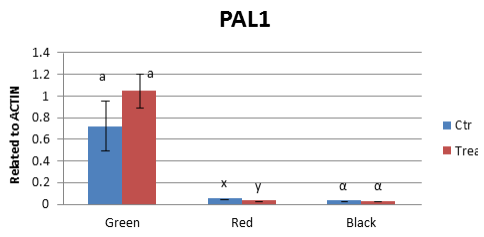

2

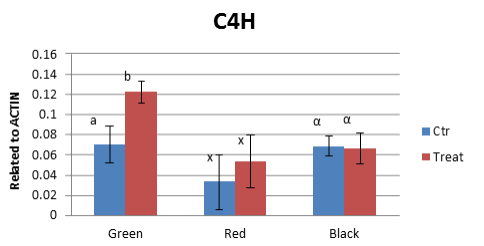

3

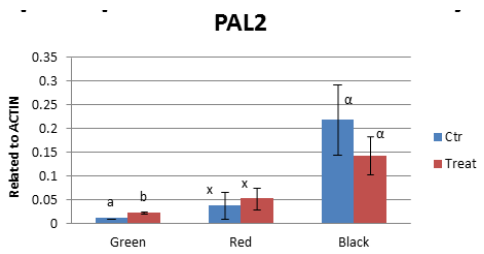

4

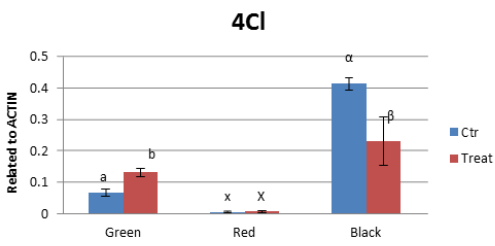

5

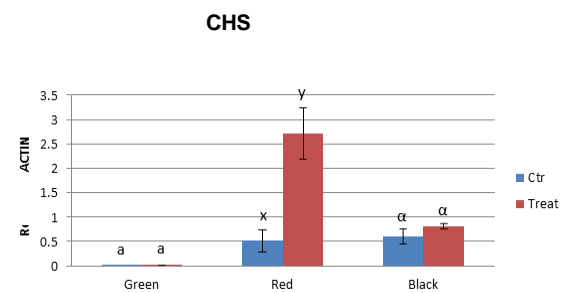

6

7

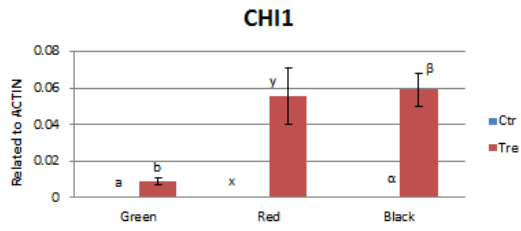

8

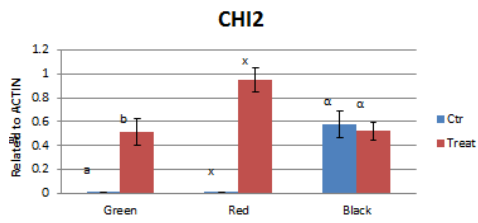

9

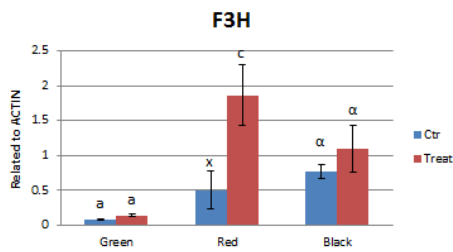

10

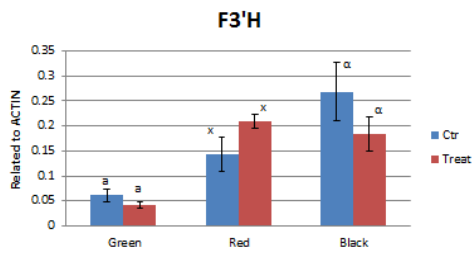

11

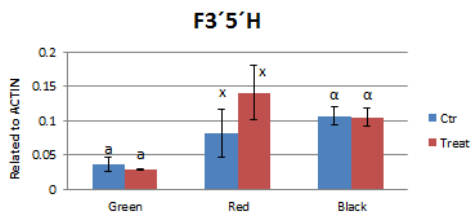

12

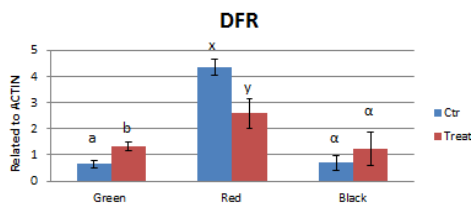

13

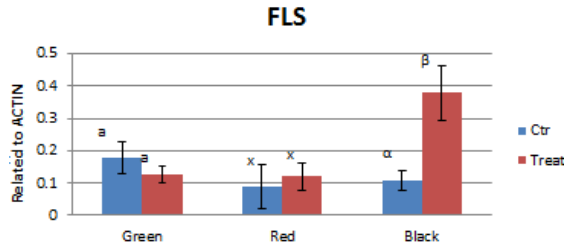

14

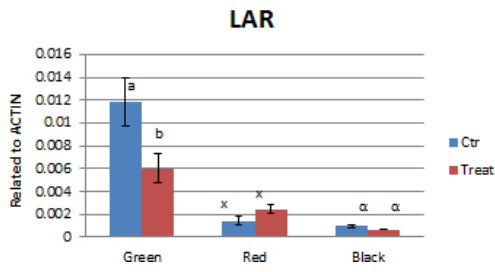

15

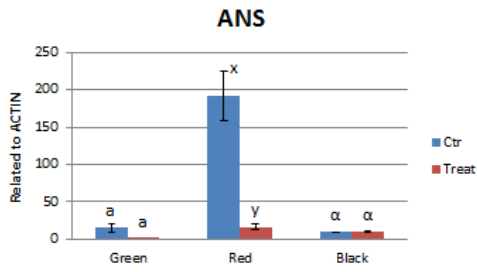

16

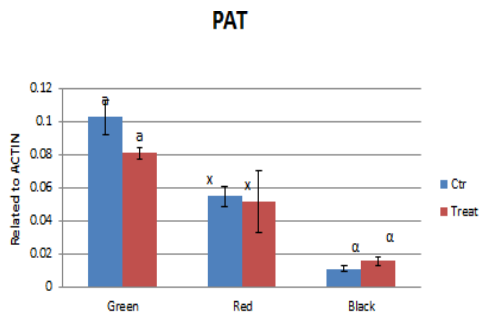

17

18

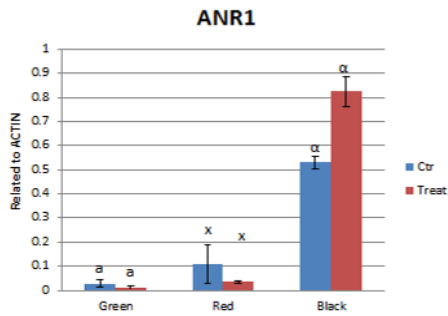

19

20

21

22

23

### ANR2

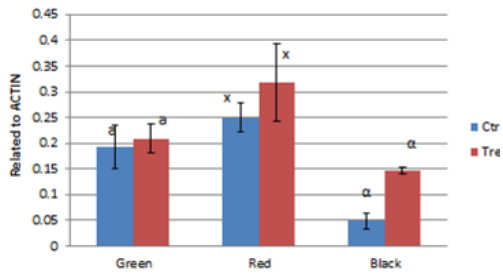

27

### AGT

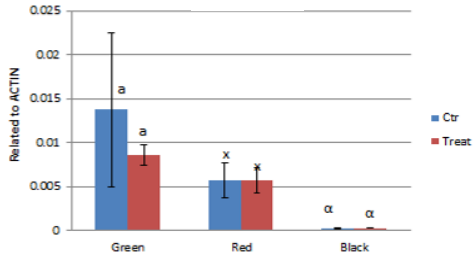

28

29

30

31

32

### FGT

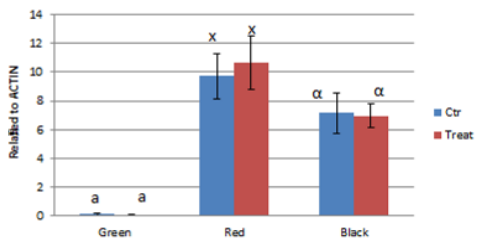

33

34

35

36

### RUMYB1

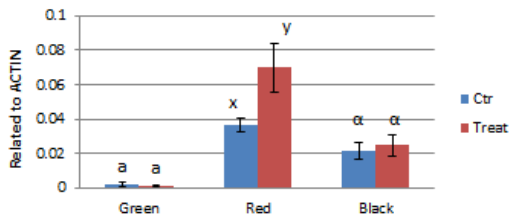

37

### RuMYB2

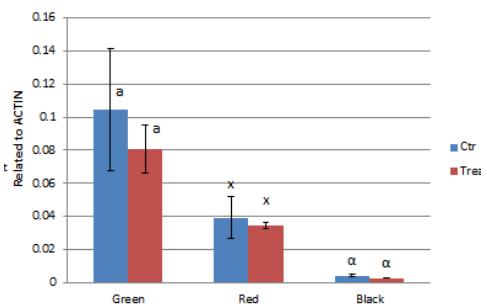

38

39

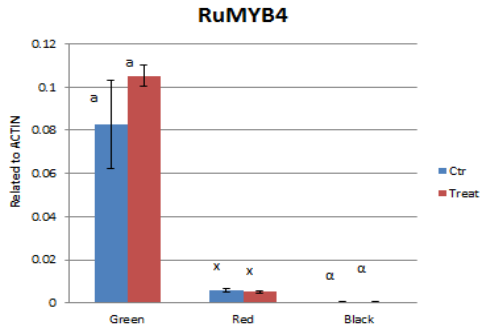

40

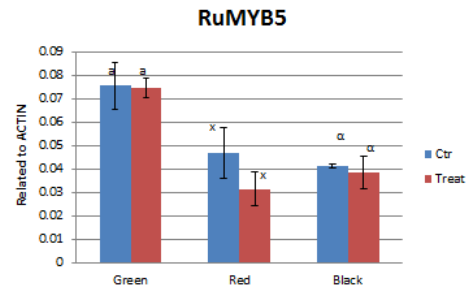

41

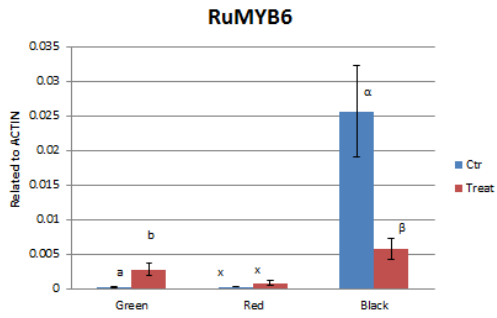

42

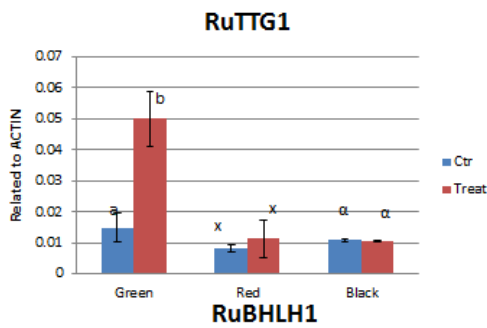

43

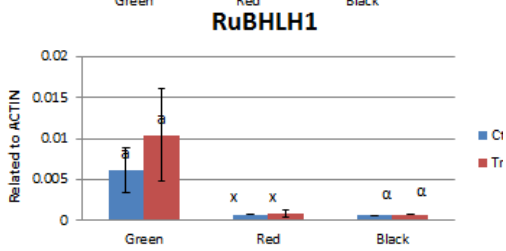

Supplement: pone.0142639.s001.pdf [file pone.0142639.s001.pdf]
