# Supplementary material for: Application of Pseudomonas fluorescens to Blackberry under Field Conditions Improves Fruit Quality by Modifying Flavonoid Metabolism
Source: PubMed Central journal article supplement (PMC4641737; doi:10.1371/journal.pone.0142639), 2015-11-11
Supplement: pone.0142639.s002.pdf [file pone.0142639.s002.pdf]

1 Supplemental material 3.

2 Phylogenetic relationship of RuMYB transcription factors with others MYB that plays a role  
3 in the regulation of flavonoid and phenylpropanoid metabolism in *Arabidopsis* and  
4 *Fragaria*. An unrooted phylogenetic tree was calculated using the CLUSTALW software  
5 using the implemented neighbor-joining method without the function for evolutionary  
6 distance correction. Evolutionary distances are proportional to the branch length. Twenty  
7 six protein sequences were selected as indicated in the figure.

8

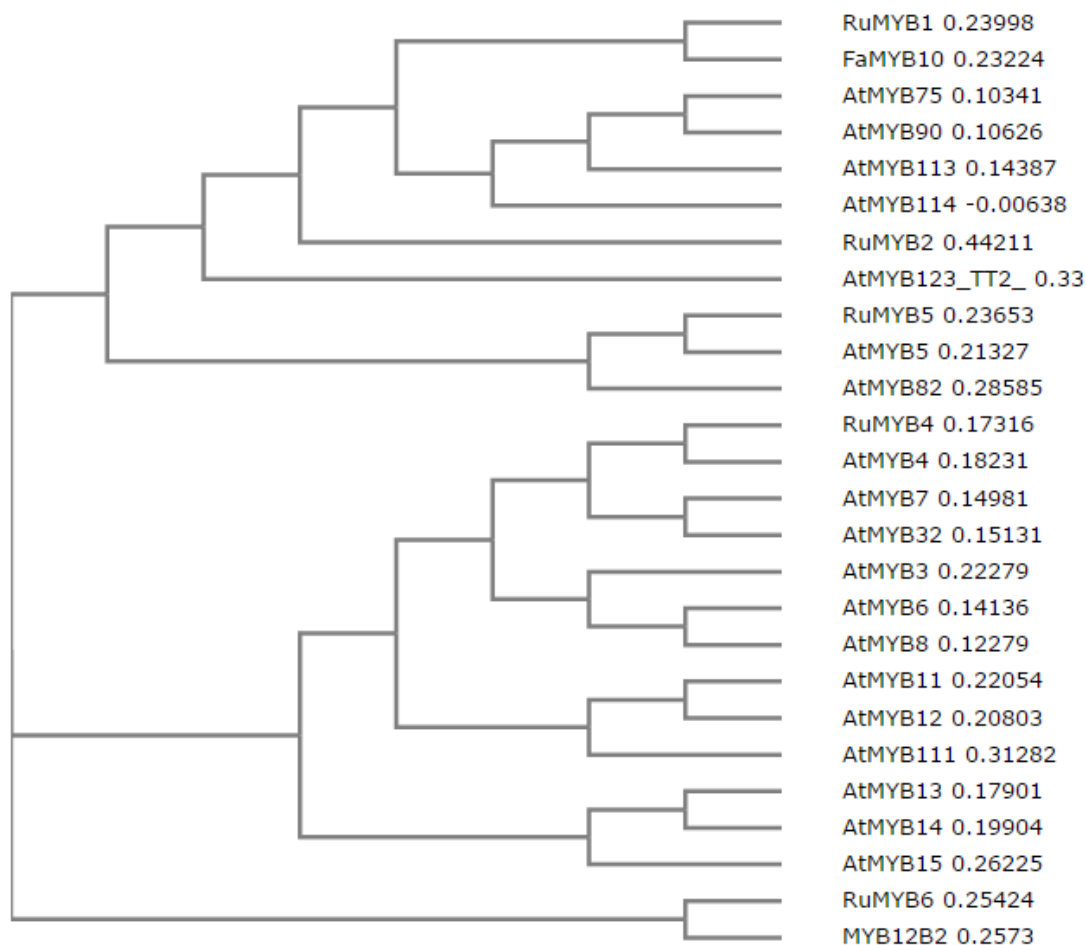

9

10

11 >RuMYB1

12 MEVRKGAWTKEEDHLLRNYIEKHGEGRWVHKVPLEAGLNRCRKSCMRWLNLYLKPNIKR  
13 GDFAEDEVDLMIRLRKLLGNRWVSLIAGRLPGRTSNDVKNYWSARRRRKIDFGVPKDNEP  
14 PKITKTTIIRPRPRTFTKSLHHL SAEAATSMHSSEQNNSWPSSSPPIENGIDEWKTLMLLED  
15 VFTNFWVEDVASLTGTGVNSAEQGFETDLWHFLQEEAR

16

>FaMYB10

17 MEGFGVRKGAWTKEEDELKQFIEIHGEGKWHHVPLKSGLNRCRKSCRLRWLNLYLKPNI  
18 KRGEFAEDEVDLIIRLHKLLGNRWSLIAGRPGRTANDVKNYWNTYQRKKDQKTASYAKK  
19 LKVKPRENTIAYTIVRPRPRTFIKRFNFTERYANIEHNSHSEVSYTSSLPTPEPPQTLQLENT  
20 DWWKDFSEDSTESIDRTMCSGLGLEDDHFFTFNFWVEDMLLSASNDLVNISYV

21 >RuMYB2

22 MGRGPRCSKDGLNKGAWMATEDKLLLDYIKNHGEGKWSNVAKETGSHFLLNLINYFVNL  
23 FLLVFFWKKGLIHYEHGVGLVHKLACWFFIFTTSRSIIVRWNYVGLKRCGKSCRLRWMI  
24 YLRPDIRRGSISDDEEELIVRLHKLGNRYSHRSLINLPFFVNCNLSHVNLINLQMVSDSRE  
25 TSWANRQNQELLELQFSENGTSSKFIQVMQCHCQNHSSQYRHSTAAHSYSSWYCANCGS  
26 SPKRRLLCGHKFRRLGQSCFSFTNVQTRLPMPIINYYWGWGSFRKFAHEFHDFGQHS  
27 FLQDTGLLCKLEQCHGPWRSWCSQRSHFSTTADHDGQECSSCFWVLGFIQVGLAWES  
28 KCHAELISFLSVLSPIFIYIHLVQCLLLVLKKKKKVLVDWAWP

29 >AtMYB123(TT2)

30 MGKRATTSVRREELNRGAWTDHEDKILRDYITTHGEGKWSTLPNQAGLKRCGKSCRLR  
31 WKNYLRPGIKRGNISDDEEELIIRLHNLGNRWSLIAGRPGRTDNEIKNHWNSNLRKRLP  
32 KTQTKQPKRIKHSTNNENNVCVIRTKAIRCSKTLFSDLSLQKKSSTSPPLKEQEMDQGG  
33 SSLMGDLEFDFDRIHSEFHFPDLMDFDGLDCGNVTSLVSSNEILGELVPAQGNLDLNRPF  
34 TSCHHRGDDEDWLRDFTC

35 >RuMYB4

36 MGRSPCCEKAHTNKGAWTKEEDRLLIAYIRAHGEGCWRSPLPKAAGLLRCGKSCRLRWI  
37 NYLRPDLKRGNFTEEEDEELIKLHSLGKNSLIAGRPGRTDNEIKNYWNTHIRKLLTRG  
38 IDPATHRPLNETAQDSATTTTISFAASSAIKEEDQKISTSIGIVGKESINPVQEKCPDLNLEL  
39 RISPPSQTKPVESFKSGGRGVCFSCSLGLKDSKSCCSCGMDNIGPTSAGTSNIAYDFLGL  
40 KNGVLDYRSLEMK

41 >AtMYB4

42 MGRSPCCEKAHTNKGAWTKEEDERLVAYIKAHGEGCWRSPLPKAAGLLRCGKSCRLRWI  
43 NYLRPDLKRGNFTEEEDEELIKLHSLGKNSLIAGRPGRTDNEIKNYWNTHIRKLLTRG  
44 IDPTSHRPIQESSASQDSKPTQLEPVTSTINISFTSAPKVETFHESISFPKSEKISMLTFK  
45 EEKDECPVQEKFPDLNLELRISLPDDVDRLQGHGKSTTPRCFKCSLGMINGMECRGRM  
46 RCDVVGSSKSGSDMSNGDFDLGLAKKETTSLGFRSLEMK

47 >RuMYB5

48 MRNPSSSASASKGKSSAAAAAASASAPAVVSSSSSKTPCCVKVGLKRGPWTPPEDELLA  
49 NYIKKEGEGRWRTLPKRAGLLRCGKSCRLRWMIYLRPSVKRGQIAPDEEDLILRLHLLG  
50 NRURPSUQHTYTYIHYDSIPFGDSGUGLRLQCFYWIDDHDDDESDFIYRWSLIAGRIPGR  
51 TDNEIKNYWNTHLSKKLISQGIDPRTHKPLNPDSSSGDHAAVNGASSSKTNQHRGMSSN  
52 PNPKSPITSSSPVSTEEAAAPNARENGYLDQGNANDDLGVIVHGAGGYGNGMTSNDSD

53 GSAPAMGALRSNLLLGNEDDEDINCCTDDVFSSFLNSLINEDPFAAAAAAAGQHQLQPLQ  
54 LVQQPNGIAPSSDLSAPAFGGWESAVIMSSAFIQKDPHRVNVVDQTQ

55 >AtMYB5

56 MMSCGGKKPVSKKTTPCCTKMGMKRGPWTVVEDEILVSFIKKEGEGRWRS LPKRAGLL  
57 RCGKSCRLRW MNYL RPSVKRGGITSDEEDLILRLHRL LGNRW S LIAGRIPGR TDNEIKNY  
58 WNTHLRKKLLRQGIDPQTHKPLDANNIHKPEEEVSGGQKYPLEPISSSHTDDTTVNGGDG  
59 DSKNSINVFGEHGYEDFGFCYDDKFSSFLNSLINDVGD PFGNIIPISQPLQMDDCKDGIV  
60 GASSSSLGHD

61 >RuMYB6

62 MDVKPGRVSN TIRSSHEEEEDDVMMDLRRGPWTVVEEDLALMNYIANHGEGRWNSLARC  
63 AGLKRTGKSCRLRWLN YLRPDVRRGNIT LEEQLLILELHSRWGNRWSKIAQHLPGR TDN  
64 EIKNYWRTRVQKHAKQLKCDVNSKQFKDTMRYLWMPRLVERIQA AASSATASSSIT  
65 TTITTAPNPSYHFNNNFQSTGAGHVALQQATLIGSNNDLAASYTTPENSSTGASSDSFGN  
66 QVSPVSELTDYTTMSVNNNNPSPMEYFQAPNPHHQIGYRDSMTSPSGYVFNQGG LNS  
67 HSFQAASAPEQNNNGQWGM DGGDFSDNLWNVEESDMWFLQQQLGNI

68 >MYB12B2

69 MERSLSGSSEEEMSITKGPWTEEEEDSVLFNYITVHGEGHWNSVARYTGLKRTGKSCRLR  
70 WLN YLRPNVRRGNIT LEEQLLIDLHSRWGNRWSKIAEHLPGRTDNEIKNYWRTRVVKQA  
71 EQLKCEVNSKQFRD TLR FVWMPRLERIQAA SSSSSSSSGQAHQTT LISNAQAHS DPC  
72 GVMTTNPSLLSEVSSSALDAHAPSLYDSSASYNLMGGGSSSSSYSAEYCYYS DIANGFG  
73 GSDLWTDENICFLQQLLADHDLS

74 >AtMYB3

75 MGRSPCCEKAHMNKGAWTKEEDQLLVDYIRKHGEGCWRS L PRAAGLQRCGKSCRLRW  
76 MN YLRPDLKRGNFTEEEDELI IKLH SLLGNKWSLIAGR LPGR TDNEIKNYWNTHIKRLLS  
77 RGIDPNSHRLINESV VSPSSLQNDV VETIHLDFSGPVKPEPVREEIGMVN NCESSGTTSEK  
78 DYGN EEDWVLNLELSVGPSYRYESTR KVS VVDSAESTRRWGSELFGAHESDAVCLCCRI  
79 GLFRNESCRCRVS DVRTH

80 >AtMYB6

81 MGRSPCCEKAHTNKGAWTKEEDQRLVDYIRNHGEGCWRS L PKSAGLLRCGKSCRLRWI  
82 NYLRPDLKRGNF TDEDEDQII IKLH SLLGNKWSLIAGR LPGR TDNEIKNYWNTHIKRLLSHG  
83 IDPQTHRQINESKT VSSQVVVPIQND AVEYSF SNLAVKPKTENS SDNGASTSGTTTDEDL  
84 RQNGECYYS DNSGH IKL NLDLTLGFGSWSGRIVGVGSSADSKPWCDPVMEARLSLL

85 >AtMYB7

86 MGRSPCCEKEHMNKGAWTKEEDERLVSYIKSHGEGCWRS L PRAAGLLRCGKSCRLRWI  
87 NYLRPDLKRGNF THDEDELI IKLH SLLGNKWSLIAARLPGR TDNEIKNYWNTHIKRLLSKG  
88 IDPATHRGINEAKISDLKKT KDQIVKDV SFVTKFEETDKSGDQKQNKYIRNGLVCKEERVV

89 VEEKIGPDLNLELRISPPWQNQREISTCTASRFYMENDMECSSETVKCQTENSSSISYSSI  
90 DISSNVGYDFLGLKTRILDFRSLEMK

91 >AtMYB8

92 MGRSPCCEKAHMNKGAWTKEEDQRLIDYIRNHGEGSWRSLPKSVGLLRGKSCRLRWI  
93 NYLRPDLKRGNFTDGEEQIIVKLHSLFGNKWSLIAGKLPGRTDNEIKNYWNTHIKRLLNR  
94 GIDPKTHGSIIEPKTTSFHPRNEDLKSTFPGSVKMKMETSCENCASTSGTTTDEDLRLSVD  
95 CDYRYDHLDELNLDLTLGYSPTRFVGVGSCY

96 >AtMYB11

97 MGRAPCCEKVGIIKGRWTAEDRTLSDYIQSNGEGSWRSLPKNAGLKRCGKSCRLRWI  
98 NYLRSDIKRGNITPEEEDVIVKLHSTLGTRWSTIASNLPGRTDNEIKNYWNSHLSRKLHG  
99 FRKPTVANTVENAPPPPKRRPGRTSRSAMKPKFILNPKNHKTPNSFKANKSDIVLPTTTIE  
100 NGECDKEDALMVLSSSSLSGAEPEGGLGPCGYGDDGDCNPSINGDDGALCLNDDIFDSCF  
101 LLDDSHAVHVSSCESNNVKNSEPYGGMSVGHKNIETMADDFVDWDFVWREGQTLWDE  
102 KEDLDSVLSRLLDGEEMESEIRQRDSNDFGEPLDIDEENKMAAWLLS

103 >AtMYB12

104 MGRAPCCEKVGIIKGRWTAEDQILSNYIQSNGEGSWRSLPKNAGLKRCGKSCRLRWI  
105 NYLRSDLKRGNITPEEEELVVKLHSTLGNRWSLIAHLPGRTDNEIKNYWNSHLSRKLHN  
106 FIRKPSISQDVSAVIMTNASSAPPPQAKRRLGRTSRSAMKPKIHRTKTRKTKTSAPPEP  
107 NADVAGADKEALMVESGAEAEELGRPCDYGGDDCNKNLMSINGDNGVLTFFDDDIIDLLL  
108 ESDPGHLYTNTTCGGDGELHNIRDSEGARGFSDTWNQGNLDCLLQSCPSVESFLNYDH  
109 QVNDASTDEFIDWDCVWQEGSDNNLWHEKENPDSMVSWLLDGDDEATIGNSNCENFG  
110 EPLDHDDESALVAWLLS

111 >AtMYB13

112 MGRRPCCEKIGLKKGPWSAEEDRILINYISLHGHPNWRALPKLAGLLRCGKSCRLRWINY  
113 LRPDIKRGNFTPHEEDTIISLHQLLGNRWSAIAAKLPGRTDNEIKNVWHTHLKRLHHSQD  
114 QNNKEDFVSTTAAEMPTSPQQQSSSSADISAITTLGNNNDISNSNKDSATSSSEDVLAII  
115 SFWSEVVLMDCDISGNEKNEKKIENWEGSLDRNDKGYNHDMEFWFDHLTSSSCIIGEMS  
116 DISEF

117 >AtMYB14

118 MGRAPCCEKMGVKGWPWTPEEDQILINYIHLHGHSNWRALPKHAGLLRCGKSCRLRWI  
119 YLRPDIKRGNFTPQEEQTIINLHESLGNRWSAIAAKLPGRTDNEIKNVWHTHLKRLSKNL  
120 NNGGDTKDVNGINETTNEKGSVIVDTASLQQFSNSITTFDISNDNKDDIMSYEDISALIDD  
121 SFWSDVISVDNSNKNEKKIEDWEGLIDRNSKCSYSNSKLYNDDMEFWFDVFTSNRRIE  
122 FSDIPEF

123 >AtMYB15

124 MGRAPCCEKMGLKRGPWTPPEEDQILVSFILNHGHSNWRALPKQAGLLRCGKSCRLRWM  
125 NYLKPDIKRGNFTKEEEDAIISLHQILGNRWSAIAAKLPGRDNEIKNVWHTHLKKRLEDYQ  
126 PAKPKTSNKKKGTKPKSESVITSSNSTRSESELADSSNPSGESLFSTSPSTSEVSSMTLIS  
127 HDGYSNEINMDNKP GDISTIDQECVSFETFGADIDESFWKETLYSQDEHNYVSN DLEVAG  
128 LVEIQQEFQNLGSANNEMIFDSEMDFWFDVLARTGGEQDLLAGL

129 >AtMYB32

130 MGRSPCCEKDHTNKGAWTKEEDDKLISYIKAHGEGCWRS LPRSAGLQRCGKSCRLRWI  
131 NYLRPDLKRGNFTLEEDDLIHLHLLGNKWSLIATRLPGRTDNEIKNYWNTHVVKRLLRK  
132 GIDPATHRPINETKTSQDSSDSSKTEDPLVKILSFGPQLEKIANFGDERIQKRVEYSVVEER  
133 CLDLNLELRISPPWQDKLHDERNLRFRV KYRCSACRFGFGNGKECSCNNVKCQTEDS  
134 SSSYSSTDISSSIGYDFLGLNNTRVLD FSTLEMK

135 >AtMYB75

136 MEGSSKGLRKGAWTTEEDSLLRQCINKYGE GKWVHQPVRAGLNRCRKSCRLRWLNLYLK  
137 PSIKRGLSSDEVDLLLRLHLLGNRWSLIAGRLPGRTANDVKNYWNTHLSKKHEPCKKI  
138 KMKKRDIPTTPALKNNVYKPRPRSFTVNNDCNHLNAPPKVDVNPPCLGLNINNVCDN  
139 SIIYNKDKKKDQLVNNLIDGDNMWLEKFLEESQEVDILVPEATTTEKGD TLAFDVDQLWSL  
140 FDGETVKFD

141 >AtMYB82

142 MECKREEGKSYVKRGLWKPEEDMILKSYVETHGEGNWADISRRSGLKRGGKSCRLRWK  
143 NYLRPNIKRGSMSPEQDLIIRMHKLLGNRWSLIAGRLPGRTDNEVKNYWNTHLNKKPNS  
144 RRQNAPESIVGATPFTDKPVMSTELRRSHGEGGEEESNTWMEETNHFGYDVHVGSPPL  
145 LISHYPDNTLVFDPCFSFTDFFPLL

146 >AtMYB90

147 MEGSSKGLRKGAWTAEEDSLLRLCIDKYGE GKWVPLRAGLNRCRKSCRLRWLNLYLK  
148 PSIKRGRLSNDEVDLLLRLHLLGNRWSLIAGRLPGRTANDVKNYWNTHLSKKHESSCCK  
149 SKMKKKNIISPPTTPVQKIGVFKPRPRSFSVNNGCSHLNGLPEVDLIP SCLGLKKNVVCEN  
150 SITCNKDDEKDDFVNLMNGDNMWLENLLGENQEADAI VPEATTAEHGATLAFDVEQLW  
151 SLFDGETVELD

152 >AtMYB111

153 MGRAPCCEKIGLKRGRWTAEEDEILTKYIQ TNGEGSWRSLPKKAGLLRCGKSCRLRWI  
154 YLRRDLKRGNITSDEEEIIVKLHSLGNRWSLIATHLPGRDNEIKNYWN SHLSRKIYAFTA  
155 VSGDGHNLLVNDVVLKKSCESSSGAKNNNKTKKKKKGRTSRSSMKKHKQMTASQCFS  
156 QPKELESDFSEGGQNGNFEGESLGPYEWLDGELERLLSSCVWECTSEEAVIGVNDEKV  
157 CESGDNSSCCVNLFEEEQGSETKIGHVGITEVDHDMTVERERE GSFSSNSNENNDKD  
158 WWVGLCNSSEVGFVDEELLDWFEFQGNVTCQSDDLWDLSDIGEITL E

159 >AtMYB113

160 MGESPKGLRKGTWTTEEDILLRQCIDKYGEGKWHRVPLRTGLNRCRKSCRLRWLNYLKP  
161 SIKRGKLCSEVDLVLRLHKLLGNRWSLIAGRPGRTANDVKNYWNTHLSKKHDERCCK  
162 TKMINKNITSHPTSSAQKIDVLKPRPRSFSDKNSCNDVNILPKVDVVPLHLGLNNNYVCES  
163 SITCNKDEQKDKLININLLDGDNMWWESLLEADVLGPEATETAKGVTLPLDFEQIWARFD  
164 EETLELN

165 >AtMYB114

166 MEGSSKGLRKGAWTAEEDSLLRQCIGKYGEGKWHQVPLRAGLNRCRKSCRLRWLNYLK  
167 PSIKRGKFSSDEVDLLLRLHKLLGNRWSLIAGRPGRTANDVKNYWNTHLSKKHEPCCKT  
168 KIKRINIITPPNTPAQKVDIF

169

170

171

172

173

174
