# Supplementary material for: Application of Pseudomonas fluorescens to Blackberry under Field Conditions Improves Fruit Quality by Modifying Flavonoid Metabolism
Source: PubMed Central journal article supplement (PMC4641737; doi:10.1371/journal.pone.0142639), 2015-11-11
Supplement: pone.0142639.s003.pdf [file pone.0142639.s003.pdf]

Supplemental material 1. Isoforms of the genes identified of phenylpropanoid pathway in *Rubus* sp. var. Lochness transcriptome.

|          | geneID                     | Gene Length | RF1 FPKM        | RF1 FPKM        | Nr-ID                                       | Nr-Score      | Nr-Value         |                                                                                              |
|----------|----------------------------|-------------|-----------------|-----------------|---------------------------------------------|---------------|------------------|----------------------------------------------------------------------------------------------|
| Ru4CL    | Unigene12367               | 794         | 0,08            | 0,80            | gij9651917 gb AAF91310.1 AF239687_1         | 517,7         | 8,00E-146        | 4-coumarate:coA ligase 1 [Rubus idaeus]                                                      |
|          | <b>Unigene16366</b>        | <b>2093</b> | <b>47,71</b>    | <b>27,18</b>    | <b>gij9651915 gb AAF91309.1 AF239686_1</b>  | <b>1055,4</b> | <b>0</b>         | <b>4-coumarate:coA ligase 2 [Rubus idaeus]</b>                                               |
|          | Unigene13214               | 311         | 3,62            | 1,43            | gij9651913 gb AAF91308.1 AF239685_1         | 140,2         | 9,00E-33         | 4-coumarate:coA ligase 3 [Rubus idaeus]                                                      |
|          | Unigene13466               | 332         | 0,80            | 1,15            | gi 470134772 ref XP_004303212.1             | 186           | 1,00E-46         | PREDIC.: 4-coumarate--CoA ligase 1-like [Fragaria vesca subsp. vesca]                        |
|          | Unigene4142                | 1732        | 2,94            | 4,22            | gij9651913 gb AAF91308.1 AF239685_1         | 939,5         | 0                | 4-coumarate:coA ligase 3 [Rubus idaeus]                                                      |
| RuAGT    | <b>Unigene8869</b>         | <b>1735</b> | <b>1858,04</b>  | <b>1503,45</b>  | <b>gi 157888994 dbj BAF80946.1 </b>         | <b>774,6</b>  | <b>0</b>         | <b>UDP-glucose: anthocyanin 3-glucosyltransferase [Rosa hybrid cultivar]</b>                 |
| RuANR    | <b>Unigene2512</b>         | <b>1341</b> | <b>4,69</b>     | <b>5,93</b>     | <b>gi 110564477 gb ABG76842.1 </b>          | <b>625,5</b>  | <b>6E-178</b>    | <b>anthocyanidin reductase [Fragaria x ananassa]</b>                                         |
|          | <b>Unigene2522</b>         | <b>1339</b> | <b>23,64</b>    | <b>23,21</b>    | <b>gi 470129936 ref XP_004300863.1 </b>     | <b>578,6</b>  | <b>8,00E-164</b> | <b>PREDIC.: anthocyanidin reductase-like [Fragaria vesca subsp. vesca]</b>                   |
|          | Unigene653                 | 627         | 1,69            | 2,53            | gi 297745410 emb CBI40490.3                 | 51,2          | 3,00E-42         | unnamed protein product [Vitis vinifera]                                                     |
| RuANS    | <b>Unigene4439</b>         | <b>1677</b> | <b>2021,14</b>  | <b>1848,25</b>  | <b>gi 470125461 ref XP_004298720.1 </b>     | <b>710,3</b>  | <b>0</b>         | <b>PREDIC.: leucoanthocyanidin dioxygenase-like [Fragaria vesca subsp. vesca]</b>            |
|          | Unigene7051                | 1422        | 247,88          | 297,89          | gi 462419517 gb EMJ23780.1                  | 605,1         | 9,00E-172        | hypothetical protein PRUPE_ppa008455mg [Prunus persica]                                      |
|          | Unigene10888               | 1576        | 134,12          | 84,78           | gi 470144031 ref XP_004307670.1             | 685,6         | 0                | PREDIC.: flavonol synthase/flavanone 3-hydroxylase-like [Fragaria vesca]                     |
| RuC4H    | Unigene19458               | 238         | 0,00            | 0,27            | gi 470127623 ref XP_004299767.1             | 159,1         | 2,00E-38         | PREDIC.: trans-cinnamate 4-monooxygenase-like [Fragaria vesca subsp. vesca]                  |
|          | Unigene21546               | 293         | 0,00            | 0,00            | gi 462422005 gb EMJ26268.1                  | 196,1         | 1,00E-49         | hypothetical protein PRUPE_ppa018282mg, partial [Prunus persica]                             |
|          | Unigene21762               | 203         | 0,33            | 0,00            | gi 470127623 ref XP_004299767.1             | 134,4         | 5,00E-31         | PREDIC.: trans-cinnamate 4-monooxygenase-like [Fragaria vesca subsp. vesca]                  |
|          | <b>Unigene5281</b>         | <b>1878</b> | <b>305,35</b>   | <b>278,87</b>   | <b>gi 221328921 gb ACM17896.1 </b>          | <b>1001,5</b> | <b>0</b>         | <b>cinnamate-4-hydroxylase [Rubus occidentalis]</b>                                          |
|          | Unigene9503                | 376         | 0,00            | 0,68            | gi 470127623 ref XP_004299767.1             | 233,8         | 6,00E-61         | PREDIC.: trans-cinnamate 4-monooxygenase-like [Fragaria vesca subsp. vesca]                  |
| RuCHI    | <b>CL5405 (Iso1)</b>       | <b>1061</b> | <b>467.8972</b> | <b>417.0408</b> | <b>gi 470144168 ref XP_004307734.1 </b>     | <b>397.1</b>  | <b>2.00E-109</b> | <b>PREDIC.: chalcone--flavonone isomerase-like [Fragaria vesca subsp. vesca]</b>             |
|          | <b>Unigene16160 (Iso2)</b> | <b>1556</b> | <b>428.1638</b> | <b>429.4765</b> | <b>gi 470143579 ref XP_004307451.1 </b>     | <b>407.1</b>  | <b>4.00E-112</b> | <b>PREDIC.: chalcone--flavonone isomerase 1-like [Fragaria vesca subsp. vesca]</b>           |
|          | Unigene17871               | 1063        | 3.6753          | 4.0663          | gi 470116014 ref XP_004294183.1             | 470.3         | 2.00E-131        | PREDIC.: chalcone--flavonone isomerase 2-like [Fragaria vesca subsp. vesca]                  |
| RuCHS    | <b>CL6637</b>              | <b>1712</b> | <b>1024,76</b>  | <b>939,12</b>   | <b>gi 22086372 gb AAM90652.1 AF400567_1</b> | <b>775</b>    | <b>0</b>         | <b>chalcone synthase 6 [Rubus idaeus]</b>                                                    |
| RuDFR    | <b>Unigene5062</b>         | <b>1117</b> | <b>407,39</b>   | <b>408,88</b>   | <b>gi 470111242 ref XP_004291858.1 </b>     | <b>645,2</b>  | <b>0</b>         | <b>PREDIC.: dihydroflavonol4-reductase/flavanone 4-reductase- [Fragaria vesca]</b>           |
|          | CL2114                     | 1421        | 7,64            | 8,59            | gi 470142458 ref XP_004306924.1             | 549,3         | 6,00E-155        | PREDIC.: dihydroflavonol-4-reductase-like [Fragaria vesca subsp. vesca]                      |
|          | Unigene1168                | 1638        | 22,48           | 20,53           | gi 470142462 ref XP_004306926.1             | 489,2         | 9,00E-137        | PREDIC.: dihydroflavonol-4-reductase-like [Fragaria vesca subsp. vesca]                      |
|          | Unigene10789               | 1389        | 10,49           | 13,59           | gi 470116315 ref XP_004294328.1             | 619,8         | 3,00E-176        | PREDIC.: dihydroflavonol-4-reductase-like [Fragaria vesca subsp. vesca]                      |
|          | CL3922                     | 1472        | 0,22            | 0,22            | gi 470109675 ref XP_004291118.1             | 618,6         | 8,00E-176        | PREDIC.: putative dihydroflavonol-4-reductase-like [Fragaria vesca subsp. vesca]             |
|          | Unigene12257               | 877         | 1,21            | 1,88            | gi 462416254 gb EMJ20991.1                  | 264,6         | 1,00E-69         | hypothetical protein PRUPE_ppa026509mg, partial [Prunus persica]                             |
|          | Unigene10163               | 1272        | 4,48            | 5,60            | gi 470112433 ref XP_004292439.1             | 672,5         | 0                | PREDIC.: epimerase family protein slr1223-like [Fragaria vesca subsp. vesca]                 |
| RuF3'5'H | <b>Unigene3145</b>         | <b>1596</b> | <b>173,76</b>   | <b>155,73</b>   | <b>gi 470103987 ref XP_004288406.1 </b>     | <b>446</b>    | <b>8E-124</b>    | <b>PREDIC.: uncharacterized protein LOC101310934 isoform 1 [Fragaria vesca subsp. vesca]</b> |

|         |                         |             |                |                |                                           |               |                  |                                                                                    |
|---------|-------------------------|-------------|----------------|----------------|-------------------------------------------|---------------|------------------|------------------------------------------------------------------------------------|
|         | CL1570                  | 1656        | 2,36           | 3,99           | gi 470125387 ref XP_004298684.1           | 846,7         | 0                | PREDIC.: flavonoid 3'-5'-hydroxylase-like [Fragaria vesca subsp. vesca]            |
| RuF3H   | <b>Unigene16038</b>     | <b>1850</b> | <b>2162,83</b> | <b>1975,59</b> | <b>gi 161597781 gb ABX74780.1 </b>        | <b>717,2</b>  | <b>0</b>         | <b>flavanone-3-hydroxylase [Rubus sp. SSL-2007]</b>                                |
|         | Unigene18040            | 1285        | 2,06           | 6,28           | gi 470145288 ref XP_004308273.1           | 620,2         | 2,00E-176        | PREDIC.: naringenin,2-oxoglutarate3-dioxygenase-like[Fragaria vesca subsp. vesca]  |
|         | Unigene2612             | 1495        | 14,88          | 11,40          | gi 470144544 ref XP_004307914.1           | 650,2         | 0                | PREDIC.: flavanone 3-dioxygenase-like [Fragaria vesca subsp. vesca]                |
|         | Unigene1033             | 1286        | 22,50          | 19,57          | gi 470141150 ref XP_004306298.1           | 641,7         | 0                | PREDIC.: naringenin,2-oxoglutarate3-dioxygenase-like [Fragaria vesca subsp. vesca] |
|         | Unigene10888            | 1576        | 134,12         | 84,78          | gi 470144031 ref XP_004307670.1           | 685,6         | 0                | PREDIC.: flavonol synthase/flavanone3-hydroxylase-like isoform 1 [Fragaria vesca]  |
|         | Unigene7051             | 1422        | 247,88         | 297,89         | gi 462419517 gb EMJ23780.1                | 605,1         | 9,00E-172        | hypothetical protein PRUPE_ppa008455mg [Prunus persica]                            |
|         | CL430                   | 1545        | 3,77           | 4,16           | gi 462403437 gb EMJ08994.1                | 497,3         | 3,00E-139        | hypothetical protein PRUPE_ppa025000mg, partial [Prunus persica]                   |
| RuF3'H  | CL1193                  | <b>1262</b> | <b>1,26</b>    | <b>2,07</b>    | gi 462401212 gb EMJ06769.1                | 610,5         | 1E-173           | hypothetical protein PRUPE_ppa008740mg [Prunus persica]                            |
|         | <b>Unigene3117</b>      | <b>1782</b> | <b>312,81</b>  | <b>327,42</b>  | <b>gi 377550336 dbj BAL63027.1 </b>       | <b>906,7</b>  | <b>0</b>         | <b>flavonoid 3'-hydroxylase [Fragaria x ananassa]</b>                              |
|         | CL1570                  | 907         | <b>1,17</b>    | <b>1,05</b>    | gi 470125387 ref XP_004298684.1           | 476,5         | 2,00E-133        | PREDIC.: flavonoid 3',5'-hydroxylase-like [Fragaria vesca subsp. vesca]            |
|         |                         | 1656        | <b>2,36</b>    | <b>3,99</b>    | gi 470125387 ref XP_004298684.1           | 846,7         | 0                | PREDIC.: flavonoid 3',5'-hydroxylase-like [Fragaria vesca subsp. vesca]            |
|         | CL1859                  | 1745        | <b>6,45</b>    | <b>3,72</b>    | gi 470149050 ref XP_004310057.1           | 831,2         | 0                | PREDIC.: geraniol 8-hydroxylase-like [Fragaria vesca subsp. vesca]                 |
|         | CL5325                  | 2145        | <b>1,36</b>    | <b>2,61</b>    | gi 470105227 ref XP_004288988.1           | 905,2         | 0                | PREDIC.: flavonoid 3'-monooxygenase-like [Fragaria vesca subsp. vesca]             |
| RuFLS   | <b>Unigene7051</b>      | <b>1422</b> | <b>247,88</b>  | <b>297,89</b>  | <b>gi 462419517 gb EMJ23780.1 </b>        | <b>605,1</b>  | <b>9,00E-172</b> | <b>hypothetical protein PRUPE_ppa008455mg [Prunus persica]</b>                     |
| RuFGT   | <b>CL2933</b>           | <b>1283</b> | <b>1,29</b>    | <b>1,59</b>    | <b>gi 157888996 dbj BAF80947.1 </b>       | <b>664,1</b>  | <b>0</b>         | <b>UDP-glucose:flavonol 3-glucosyltransferase [Rosa hybrid cultivar]</b>           |
| RuLAR   | <b>Unigene488</b>       | <b>1313</b> | <b>4,14</b>    | <b>6,00</b>    | <b>gi 401715671 gb AFP99288.1 </b>        | <b>646,4</b>  | <b>0</b>         | <b>leucoanthocyanidin reductase [Fragaria x ananassa]</b>                          |
| RuPAL   | <b>CL4350 PAL 1</b>     | <b>1725</b> | <b>0,61</b>    | <b>0,41</b>    | <b>gi 14195012 sp Q9M568.1 PAL1_RUBID</b> | <b>1002,3</b> | <b>0</b>         | <b>RecName: Full=Phenylalanine ammonia-lyase 1; AltName: Full=RiPAL1</b>           |
|         | <b>Unigene698 PAL 2</b> | <b>803</b>  | <b>8,99</b>    | <b>7,84</b>    | <b>gi 14195012 sp Q9M568.1 PAL1_RUBID</b> | <b>369,4</b>  | <b>3,00E-101</b> | <b>RecName: Full=Phenylalanine ammonia-lyase 1; AltName: Full=RiPAL1</b>           |
| RuPAT   | <b>Unigene7392</b>      | <b>1794</b> | <b>4.4662</b>  | <b>4.3936</b>  | <b>gi 470144854 ref XP_004308062.1 </b>   | <b>880.2</b>  | <b>0</b>         | <b>PREDIC.: protein TRANSPARENT TESTA 12-like [Fragaria vesca subsp. vesca]</b>    |
|         | Unigene7484             | 1447        | 0.4119         | 0.5272         | gi 470144854 ref XP_004308062.1           | 734.2         | 0                | PREDIC.: protein TRANSPARENT TESTA 12-like [Fragaria vesca subsp. vesca]           |
|         | Unigene5791             | 1690        | 1.4106         | 1.5045         | gi 470144854 ref XP_004308062.1           | 876.7         | 0                | PREDIC.: protein TRANSPARENT TESTA 12-like [Fragaria vesca subsp. vesca]           |
| RuMYB1  | CL343                   | 1079        | 12,70          | 11,43          | gi 393808395 gb AFN25407.1                | 427,2         | 2E-118           | R2R3 MYB transcription factor [Rubus hybrid cultivar]                              |
| RuMYB2  | Unigene13073            | 1156        | 19,42          | 19,69          | gi 315937167 gb ADU56173.1                | 464,9         | 1E-129           | MYB domain class transcription factor [Fragaria vesca]                             |
| RuMYB4  | <b>CL4055</b>           | <b>1182</b> | <b>6,83</b>    | <b>9,52</b>    | <b>gi 470107055 ref XP_004289866.1 </b>   | <b>470,7</b>  | <b>2,00E-131</b> | <b>PREDIC.: myb-related protein 308-like [Fragaria vesca subsp. vesca]</b>         |
| RuMYB5  | <b>CL216</b>            | <b>2127</b> | <b>2.8642</b>  | <b>2.8391</b>  | <b>gi 470117735 ref XP_004295005.1 </b>   | <b>509.6</b>  | <b>8.00E-143</b> | <b>PREDIC.: transcription repressor MYB5-like [Fragaria vesca subsp. vesca]</b>    |
| RuMYB6  | <b>Unigene12151</b>     | <b>1391</b> | <b>8.5213</b>  | <b>9.0939</b>  | <b>gi 327412615 emb CCA29096.1 </b>       | <b>624</b>    | <b>1.00E-177</b> | <b>putative MYB transcription factor [Rosa rugosa]</b>                             |
| RuBHLH1 | <b>Unigene12758</b>     | <b>2842</b> | <b>26,93</b>   | <b>28,41</b>   | <b>gi 401782370 dbj BAM36702.1 </b>       | <b>1261,9</b> | <b>0</b>         | <b>bHLH transcriptional factor AN1 homolog [Rosa hybrid cultivar]</b>              |

|       |                     |      |       |       |                                      |       |           |                                                                                |
|-------|---------------------|------|-------|-------|--------------------------------------|-------|-----------|--------------------------------------------------------------------------------|
| TTG1  | <b>CL6588</b>       | 1557 | 16,12 | 13,84 | gi 336442437 gb AEI55401.1           | 703,7 | 0         | TTG1 [Rubus idaeus]                                                            |
| RuPR1 | <b>Unigene9504</b>  | 387  | 0,34  | 0,49  | gi 470120663 ref XP_004296417.1      | 250   | 8,00E-66  | PREDIC.: pathogenesis-related protein PR-1-like [Fragaria vesca subsp. vesca]  |
| RuPR2 | <b>Unigene6519</b>  | 1305 | 7,81  | 6,19  | gi 16903144 gb AAL30426.1 AF435089_1 | 538,5 | 9,00E-152 | beta-1,3-glucanase [Prunus persica]                                            |
| RuPR3 | <b>Unigene13345</b> | 330  | 0,60  | 0,39  | gi 470144783 ref XP_004308027.1      | 208,8 | 2,00E-53  | PREDIC.: acidic endochitinase-like [Fragaria vesca subsp. vesca]               |
| RuPR4 | <b>Unigene8680</b>  | 465  | 1,85  | 2,05  | gi 470114870 ref XP_004293631.1      | 271,2 | 3,00E-72  | PREDIC.: pathogenesis-related protein PR-4B-like [Fragaria vesca subsp. vesca] |
